# Supplementary material for: Engineered phage nanofibers induce angiogenesis
Source: Royal Society of Chemistry journal article supplement (doi:10.1039/c7nr03332j), 2017-01-01
Supplement: c7nr03332j1.pdf [file c7nr03332j1.pdf]

*Electronic supplementary information (ESI)*

## Engineered phage nanofibers induce angiogenesis

So Young Yoo\*, Kshitiz Raj Shrestha, Su-Nam Jeong, Jeong-In Kang and Seung-Wuk Lee

\* Corresponding author at: BIO-IT Foundry Technology Institute, Pusan National University, Busan 46241 & Research Institute for Convergence of Biomedical Science and Technology, Pusan National University Yangsan Hospital, Yangsan 50612, Republic of Korea. E-mail: [yoosy2@gmail.com](mailto:yoosy2@gmail.com); [yoosy@pusan.ac.kr](mailto:yoosy@pusan.ac.kr)

**Table S1. Primer sequences for pVIII and pIII engineering**

| Name       | Oligonucleotide Primer Sequence*                                                                                                  | Insert Peptide Sequence**                        |
|------------|-----------------------------------------------------------------------------------------------------------------------------------|--------------------------------------------------|
| p8-fw RGD  | 5' ATATAT <b>CTGCAG</b> <i>NK (NNK)<sub>2</sub> CGTGGT</i><br><i>GAT (NNK)<sub>2</sub></i><br>GATCCCGCAAAGCGGCCTTTA ACTC CC<br>3' | <i>AXXXRGDXXDP</i><br><br><i>ADSGRGDTEDP ***</i> |
| p8-fw SDKP | 5' ATATAT <b>CTGCAG</b> <i>NK AGCGATAAACCG</i><br><i>(NNK)<sub>2</sub></i><br>GATCCCGCAAAGCGGCCTTTAACT<br>CCCTGCAAGCC 3'          | <i>AGSDKPYVDP ***</i>                            |
| p8-rev1376 | 5' CCTCTGCAGCGAAAGACAGCATCGG 3'                                                                                                   |                                                  |
| p3-Fwd1626 | 5' AAACACT <b>CGGCCG</b><br>AAACTGTTGAAAGT TGTTTAGC 3'                                                                            |                                                  |
| p3-rev RGD | 5' TATATA <b>CGGCCG</b> A<br><i>TCCACCGCCGCAGC</i><br><i>TATCGCCACGGCCGCACGC</i><br>CGAGTGAGAATAGAAAGGAACCACTAAA<br>G GAATTGCG 3' | <i>SHSACGRGDSCGGGA</i>                           |

\* For primer oligonucleotide sequences the restriction sites are shown in **bold**, and the insert is *underlined and italic*

\*\* For the resulting peptide sequence the insert is *underlined and italic*

\*\*\* Constructed from partial library approach,<sup>1</sup> selected sequence indicated

**Table S2. Phage cloning PCR conditions**

| <b>PCR Ingredients</b>                        | <b>pVIII PCR Conditions</b>     | <b>pIII PCR Conditions</b>      |
|-----------------------------------------------|---------------------------------|---------------------------------|
| ~25ng dsDNA template*                         |                                 |                                 |
| 2.5µL 10µM forward primer                     |                                 |                                 |
| 2.5µL 10µM reverse primer                     |                                 |                                 |
| 1µL dNTP (10mM mix of<br>A, T, G & C bases)   | 98C 1min<br>/ 98 °C 15 sec      | 98C 1min<br>/ 98 °C 15 sec      |
| 1µL DMSO                                      | 25x < 58 °C** 20 sec            | 25x < 61 °C 20 sec              |
| 10 µL 5X HF Phusion<br>Polymerase Buffer      | \ 72 °C 3min 30sec<br>72C 4 min | \ 72 °C 3min 30sec<br>72C 4 min |
| balance with sterile H <sub>2</sub> O to 50µL | 4C ∞                            | 4C ∞                            |
| 1 µL Phusion Polymerase<br>Enzyme             |                                 |                                 |

\* ~1 µL, use any template that has a PstI and a BamHI site for the pVIII M13 engineering; have the EagI and the Acc65I sites for pIII M13 engineering

\*\* Primer annealing temperature = Primer T<sub>m</sub> (lower of the two primers) – 2

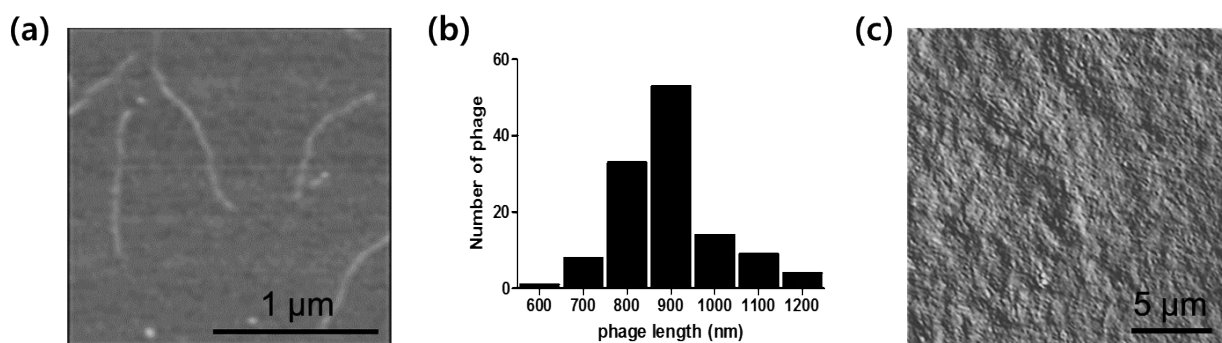

**Fig. S1. AFM images of engineered phage nanofiber and its drop-cast film surface.** (a) AFM image showed that the engineered phage have nanofibrous structure. 250 ng/ml phage solution was used. (b) Distribution of individual phage length shows that phage have  $\approx 880$  nm in length. (c) The resulting phage drop-cast could form nanofibrous phage film.

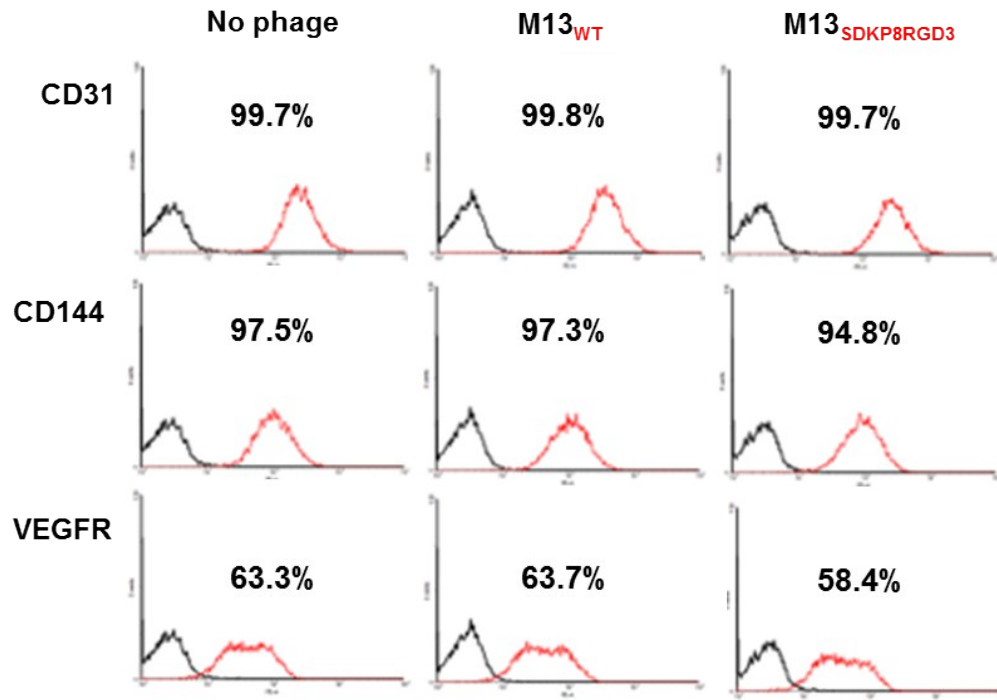

**Fig. S2. The surface markers of endothelial cells were detected by flow cytometry analysis for CD31, CD144 and VEGF2.** Histograms represent the cell number (y-axis) versus the fluorescent intensity (x-axis, log scale). EPCs were used. Flow cytometry analysis gating was performed using cells stained with isotype-matched IgG as a negative control. Black lines indicate the negative control cells and red lines indicate cells stained with each corresponding antibody.

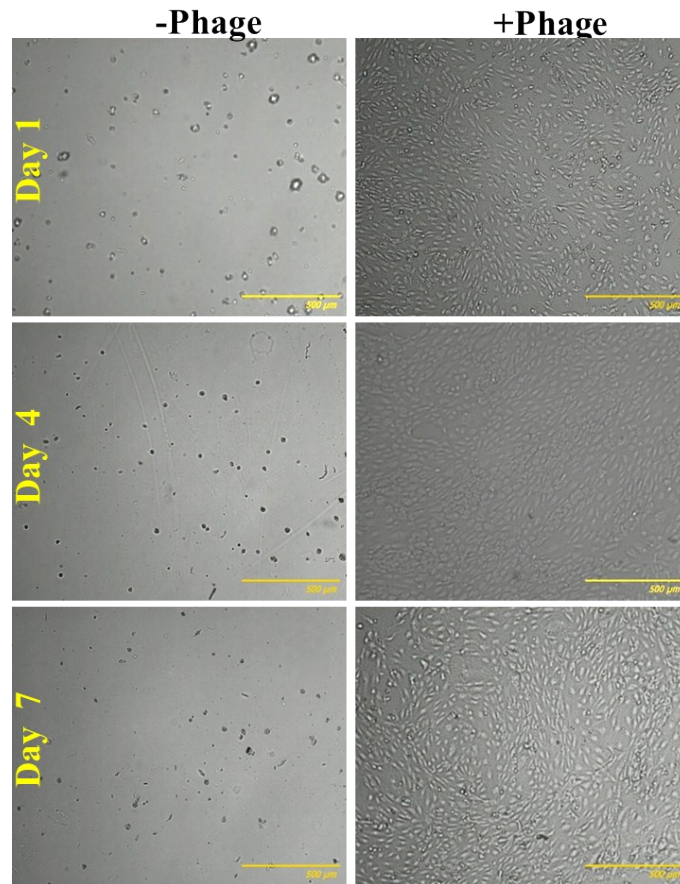

**Fig. S3. HUVECs cultured on PA hydrogel substrate with or without phage.** Phages were resuspended in PA hydrogel substrate at a final concentration of 1 mg/ml (+Phage). PA hydrogel consisted of 4% acrylamide and 0.04% bisacrylamide.

## References

1. A. Merzlyak, S. Indrakanti and S. W. Lee, *Nano Lett*, 2009, **9**, 846-852.
